# Supplementary material for: Evaluation potential of PGPR to protect tomato against Fusarium wilt and promote plant growth
Source: PeerJ journal article supplement (doi:10.7717/peerj.11194), 2021-04-16

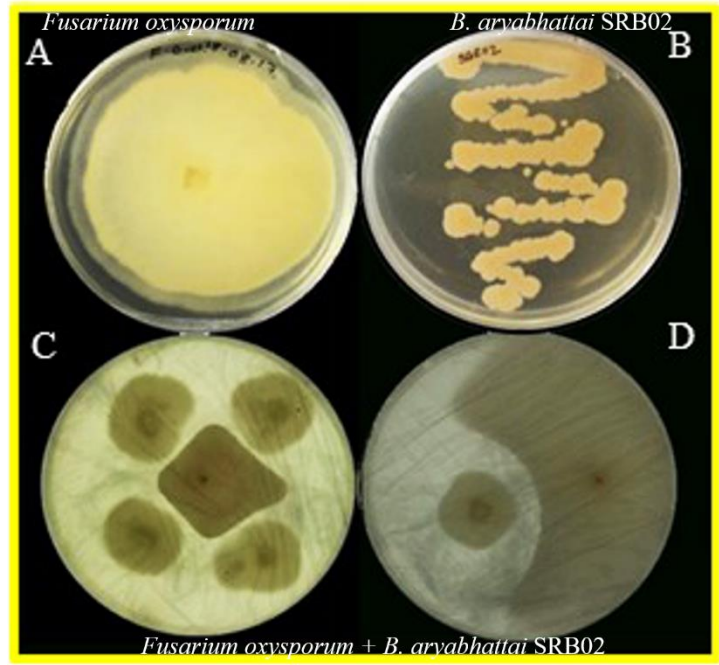

Supplement: Figure_S1.pdf [file Figure_S1.pdf]
